# Supplementary material for: Soft, skin-interfaced microfluidic systems with integrated enzymatic assays for measuring the concentration of ammonia and ethanol in sweat
Source: Royal Society of Chemistry journal article supplement (doi:10.1039/c9lc01045a), 2019-11-20
Supplement: c9lc01045a1.pdf [file c9lc01045a1.pdf]

# 1 **Lab on a Chip**

## 2 **Soft, skin-interfaced microfluidic systems with integrated enzymatic assays for measuring** 3 **the concentration of ammonia and ethanol in sweat**

4

5 Sung Bong Kim, Jahyun Koo, Jangryeol Yoon, Aurélie Hourlier-Fargette, Boram Lee, Seongbin  
6 Jo, Shulin Chen, Jungil Choi, Yong Suk Oh, Sang Min Won, Alexander J. Aranyosi, Stephen P.  
7 Lee, Jeffrey B. Model, Paul V. Braun, Chulhwan Park, Roozbeh Ghaffari, John A. Rogers

8

## 9 **Supporting Information #1**

10 *Statistical Analysis:* Response surface methodology (RSM) was used to investigate the behavior  
11 of enzymatic color development for sweat ammonia and alcohol assays. Central composite design  
12 (CCD) techniques yielded 28 runs of experimental design with variables such as enzyme loading,  
13 reaction temperature, pH, and chloride concentration. The results defined a second-order  
14 (quadratic) polynomial equation by regression of the experimental results (Table S1). The second-  
15 order modeling equation can be written as following:

$$16 \quad y = \beta_0 + \sum \beta_i X_i + \sum \beta_{ii} X_i^2 + \sum \beta_{ij} X_i X_j \quad (\text{Eq. S1})$$

17 Here,  $y$  is the predicted response,  $X_i$  and  $X_j$  are the input variables,  $\beta_0$  is the offset term,  $\beta_0$  is the  
18  $i^{\text{th}}$  linear coefficient,  $\beta_{ii}$  is the quadratic coefficient, and  $\beta_{ij}$  is the  $ij^{\text{th}}$  interaction coefficient.  
19 Statistical analysis relied on coding variables to normalize the relative numerical scales of the  
20 various factors. The coded values were assigned using following equation:

$$21 \quad x_i = \frac{(X_i - X_0)}{\Delta X} \quad (i = 1, 2, 3, \dots, j) \quad (\text{Eq. S2})$$

Where  $x_i$  is the coded value of the variable  $X_i$ ,  $X_0$  is the independent variable of real value at the center point, and  $\Delta X$  is the step change value. Table S5 shows the assignment of coded values of the experimental (real) values. Design Expert 7.0 (Stat-Ease, Inc., Minneapolis, MN), a statistical software package, enabled overall statistical studies of experimental design of CCD, linear regression, and analysis of variance (ANOVA).

*Results of RSM and statistics:* Central composite design, a robust RSM model, facilitates experimental design of various significant factors (enzyme loading amount, temperature of reaction, pH, and chloride concentration) to yield second-order polynomial equations by linear regression of the resulting data (Design Expert 7.0). The linear regression results for ammonia ( $y_1$ ) and alcohol ( $y_2$ ) using the experimental data (initial reaction rate) can be summarized in the following equations;

$$y_1 = 8.45 + 0.57X_1 + 1.18X_2 - 0.072X_3 - 0.30X_4 + 0.31X_1X_2 - 0.0028X_1X_3 - 0.19X_1X_4 - 0.028X_2X_3 + 0.058X_2X_4 + 0.12X_3X_4 - 0.63X_1^2 - 0.70X_2^2 - 0.82X_3^2 - 0.48X_4^2 \quad (\text{Eq. S3})$$

$$y_2 = 22.88 + 3.02X_1 + 3.07X_2 + 0.21X_3 - 0.96X_4 - 0.12X_1X_2 + 0.94X_1X_3 + 0.74X_1X_4 + 0.48X_2X_3 + 0.10X_2X_4 - 1.14X_3X_4 - 2.12X_1^2 - 3.10X_2^2 - 2.47X_3^2 - 1.03X_4^2 \quad (\text{Eq. S4})$$

## 38 Supporting Information #2

39 **Table S1** Fitting results of Lineweaver-Burk plot and the kinetics parameters

40 a.  $\text{NH}_3$

|               |                                            | 12       | 10       | 8        | 6        | 4        |
|---------------|--------------------------------------------|----------|----------|----------|----------|----------|
| $1/V_{max}$   | (Intercept)                                | 1.592857 | 1.716812 | 1.838416 | 1.658628 | 1.62157  |
| $K_m/V_{max}$ | (Slope)                                    | 16.72805 | 18.14555 | 20.09868 | 23.12009 | 27.30026 |
| $R^2$         |                                            | 0.999718 | 0.999981 | 0.999908 | 0.999304 | 0.99953  |
| $V_{max}$     | (mmol·L <sup>-1</sup> ·min <sup>-1</sup> ) | 0.627803 | 0.582475 | 0.543946 | 0.602908 | 0.616686 |
| $K_m$         | (mmol·L <sup>-1</sup> )                    | 10.50191 | 10.56933 | 10.93261 | 13.93929 | 16.8357  |

41

42 b. EtOH

|               |                                            | 25       | 20       | 15       | 10       | 5        |
|---------------|--------------------------------------------|----------|----------|----------|----------|----------|
| $1/V_{max}$   | (Intercept)                                | 0.885042 | 0.93228  | 0.905732 | 0.99461  | 0.583175 |
| $K_m/V_{max}$ | (Slope)                                    | 6.293456 | 7.57048  | 9.36009  | 11.64613 | 17.53888 |
| $R^2$         |                                            | 0.99977  | 0.999348 | 0.997904 | 0.9981   | 0.976902 |
| $V_{max}$     | (mmol·L <sup>-1</sup> ·min <sup>-1</sup> ) | 1.12989  | 1.072639 | 1.104079 | 1.005419 | 1.714752 |
| $K_m$         | (mmol·L <sup>-1</sup> )                    | 7.110916 | 8.120391 | 10.33428 | 11.70925 | 30.07483 |

43

44

45

46 **Table S2** Experimental design of CCD and results.

| Run | Enzyme<br>loading | Temp.          | pH             | Cl             | Initial<br>Reaction<br>Rate | Enzyme<br>loading | Temp.          | pH             | Cl             | Initial<br>Reaction<br>Rate |
|-----|-------------------|----------------|----------------|----------------|-----------------------------|-------------------|----------------|----------------|----------------|-----------------------------|
|     | X <sub>1</sub>    | X <sub>2</sub> | X <sub>3</sub> | X <sub>4</sub> |                             | X <sub>1</sub>    | X <sub>2</sub> | X <sub>3</sub> | X <sub>4</sub> |                             |
| 1   | 1                 | -1             | 1              | -1             | 0.415                       | -1                | 1              | 1              | 1              | 1.400                       |
| 2   | 0                 | 0              | 0              | -2             | 0.798                       | 2                 | 0              | 0              | 0              | 2.584                       |
| 3   | -1                | 1              | 1              | 1              | 0.620                       | 0                 | 0              | 0              | -2             | 2.370                       |
| 4   | 0                 | 0              | 0              | 0              | 0.806                       | -1                | -1             | 1              | -1             | 0.944                       |
| 5   | 0                 | 0              | 2              | 0              | 0.519                       | -1                | 1              | -1             | 1              | 1.365                       |
| 6   | 1                 | -1             | 1              | 1              | 0.411                       | 1                 | 1              | -1             | 1              | 1.666                       |
| 7   | 0                 | 0              | -2             | 0              | 0.571                       | 1                 | -1             | -1             | -1             | 0.698                       |
| 8   | 1                 | 1              | -1             | 1              | 0.661                       | 1                 | 1              | 1              | 1              | 1.658                       |
| 9   | 0                 | 0              | 0              | 2              | 0.565                       | 1                 | 1              | 1              | -1             | 2.351                       |
| 10  | -1                | 1              | 1              | -1             | 0.587                       | 0                 | 0              | 0              | 0              | 2.115                       |
| 11  | -1                | -1             | -1             | 1              | 0.403                       | -1                | 1              | 1              | -1             | 1.410                       |
| 12  | 0                 | 0              | 0              | 0              | 0.941                       | 0                 | 0              | 0              | 2              | 1.805                       |
| 13  | -1                | 1              | -1             | 1              | 0.698                       | 0                 | 2              | 0              | 0              | 2.001                       |
| 14  | -1                | -1             | 1              | 1              | 0.469                       | -1                | -1             | -1             | 1              | 0.494                       |
| 15  | -1                | -1             | 1              | -1             | 0.485                       | -1                | 1              | -1             | -1             | 1.335                       |
| 16  | -1                | 1              | -1             | -1             | 0.633                       | -2                | 0              | 0              | 0              | 0.715                       |
| 17  | 0                 | 2              | 0              | 0              | 0.814                       | 1                 | 1              | -1             | -1             | 1.501                       |
| 18  | 1                 | -1             | -1             | -1             | 0.514                       | 1                 | -1             | 1              | -1             | 1.574                       |
| 19  | 1                 | 1              | 1              | -1             | 0.786                       | 1                 | -1             | -1             | 1              | 1.598                       |
| 20  | 0                 | -2             | 0              | 0              | 0.368                       | 0                 | 0              | 0              | 0              | 2.468                       |
| 21  | -1                | -1             | -1             | -1             | 0.461                       | 0                 | 0              | 0              | 0              | 2.290                       |
| 22  | 0                 | 0              | 0              | 0              | 0.837                       | 0                 | 0              | -2             | 0              | 1.668                       |
| 23  | 2                 | 0              | 0              | 0              | 0.869                       | 0                 | -2             | 0              | 0              | 0.514                       |
| 24  | 1                 | -1             | -1             | 1              | 0.415                       | -1                | -1             | -1             | -1             | 1.265                       |
| 25  | -2                | 0              | 0              | 0              | 0.368                       | -1                | -1             | 1              | 1              | 0.515                       |
| 26  | 1                 | 1              | -1             | -1             | 0.794                       | 0                 | 0              | 0              | 0              | 2.278                       |
| 27  | 1                 | 1              | 1              | 1              | 0.735                       | 0                 | 0              | 2              | 0              | 1.351                       |
| 28  | 0                 | 0              | 0              | 0              | 0.794                       | 1                 | -1             | 1              | 1              | 1.200                       |

47

48

49 **Table S3** Coded values for RSM.

| Factors        | (Unit)  | Symbol |                 | -2 | -1 | 0  | 1   | 2   |
|----------------|---------|--------|-----------------|----|----|----|-----|-----|
| Enzyme loading | (%)     | X1     | NH <sub>3</sub> | 4  | 8  | 12 | 16  | 20  |
|                | (mg/mL) |        | EtOH            | 10 | 20 | 30 | 40  | 60  |
| Temperature    | (°C)    | X2     |                 | 20 | 25 | 30 | 35  | 40  |
| pH             |         | X3     |                 | 5  | 6  | 7  | 8   | 9   |
| Chloride       | (mM)    | X4     |                 | 10 | 40 | 70 | 100 | 130 |

50

51

52 **Table S4** Fitting results

53 a. NH<sub>3</sub>

| Source             | Sum of Squares | DF | Mean Square | F-Value  | Prob > F |
|--------------------|----------------|----|-------------|----------|----------|
| Mean vs Total      | 6648.46        | 1  | 6648.46     |          |          |
| Linear vs Mean     | 468.6802       | 4  | 117.1701    | 4.763589 | 0.0060   |
| 2FI vs Linear      | 47.98079       | 6  | 7.996799    | 0.26257  | 0.9469   |
| Quadratic vs 2FI   | 333.1909       | 4  | 83.29772    | 5.86732  | 0.0063   |
| Cubic vs Quadratic | 121.4259       | 8  | 15.17823    | 1.20207  | 0.4385   |
| Residual           | 63.13374       | 5  | 12.62675    |          |          |
| Total              | 7682.871       | 28 | 274.3883    |          |          |

54

55 b. EtOH

| Source             | Sum of Squares | DF | Mean Square | F-Value  | Prob > F |
|--------------------|----------------|----|-------------|----------|----------|
| Mean vs Total      | 1075.241       | 1  | 1075.241    |          |          |
| Linear vs Mean     | 43.74645       | 4  | 10.93661    | 6.542068 | 0.0011   |
| 2FI vs Linear      | 2.454738       | 6  | 0.409123    | 0.193223 | 0.9744   |
| Quadratic vs 2FI   | 25.6222        | 4  | 6.40555     | 8.027783 | 0.0017   |
| Cubic vs Quadratic | 8.101563       | 8  | 1.012695    | 2.2292   | 0.1963   |
| Residual           | 2.271433       | 5  | 0.454287    |          |          |
| Total              | 1157.438       | 28 | 41.33707    |          |          |

56

57 **Table S5** ANOVA58 a. NH<sub>3</sub>

| Source                            | Sum of Squares | DF | Mean Square | F-value  | Prob > F |
|-----------------------------------|----------------|----|-------------|----------|----------|
| <b>Model</b>                      | 71.82339       | 14 | 5.130242    | 6.429497 | 0.0009   |
| <b>X<sub>1</sub></b>              | 7.914314       | 1  | 7.914314    | 9.918647 | 0.0077   |
| <b>X<sub>2</sub></b>              | 33.48371       | 1  | 33.48371    | 41.9636  | < 0.0001 |
| <b>X<sub>3</sub></b>              | 0.125571       | 1  | 0.125571    | 0.157372 | 0.6980   |
| <b>X<sub>4</sub></b>              | 2.222851       | 1  | 2.222851    | 2.785797 | 0.1190   |
| <b>X<sub>1</sub>X<sub>2</sub></b> | 1.567504       | 1  | 1.567504    | 1.964481 | 0.1845   |
| <b>X<sub>1</sub>X<sub>3</sub></b> | 0.000132       | 1  | 0.000132    | 0.000166 | 0.9899   |
| <b>X<sub>1</sub>X<sub>4</sub></b> | 0.604506       | 1  | 0.604506    | 0.7576   | 0.3999   |
| <b>X<sub>2</sub>X<sub>3</sub></b> | 0.012544       | 1  | 0.012544    | 0.015721 | 0.9021   |
| <b>X<sub>2</sub>X<sub>4</sub></b> | 0.053361       | 1  | 0.053361    | 0.066875 | 0.8000   |
| <b>X<sub>3</sub>X<sub>4</sub></b> | 0.21669        | 1  | 0.21669     | 0.271568 | 0.6110   |
| <b>X<sub>1</sub><sup>2</sup></b>  | 9.620334       | 1  | 9.620334    | 12.05672 | 0.0041   |
| <b>X<sub>2</sub><sup>2</sup></b>  | 11.82308       | 1  | 11.82308    | 14.81733 | 0.0020   |
| <b>X<sub>3</sub><sup>2</sup></b>  | 16.00993       | 1  | 16.00993    | 20.06452 | 0.0006   |
| <b>X<sub>4</sub><sup>2</sup></b>  | 5.437824       | 1  | 5.437824    | 6.814976 | 0.0216   |
| <b>Residual</b>                   | 10.373         | 13 | 0.797923    |          |          |
| <b>Lack of Fit</b>                | 9.027528       | 10 | 0.902753    | 2.012877 | 0.3073   |
| <b>Pure Error</b>                 | 1.345467       | 3  | 0.448489    |          |          |
| <b>Cor Total</b>                  | 82.19638       | 27 |             |          |          |

59 Std. Dev.: 0.89, R-square: 0.8738 and CV: 14.41%

60 b. EtOH

| Source                            | Sum of Squares | DF | Mean Square | F-value | Prob > F |
|-----------------------------------|----------------|----|-------------|---------|----------|
| <b>Model</b>                      | 849.85         | 14 | 60.704      | 4.2758  | 0.0064   |
| <b>X<sub>1</sub></b>              | 219.14         | 1  | 219.14      | 15.436  | 0.0017   |
| <b>X<sub>2</sub></b>              | 226.25         | 1  | 226.25      | 15.937  | 0.0015   |
| <b>X<sub>3</sub></b>              | 1.0313         | 1  | 1.0313      | 0.0726  | 0.7918   |
| <b>X<sub>4</sub></b>              | 22.259         | 1  | 22.259      | 1.5679  | 0.2326   |
| <b>X<sub>1</sub>X<sub>2</sub></b> | 0.2179         | 1  | 0.2179      | 0.0153  | 0.9033   |
| <b>X<sub>1</sub>X<sub>3</sub></b> | 14.237         | 1  | 14.237      | 1.0029  | 0.3349   |
| <b>X<sub>1</sub>X<sub>4</sub></b> | 8.6804         | 1  | 8.6804      | 0.6114  | 0.4483   |
| <b>X<sub>2</sub>X<sub>3</sub></b> | 3.7452         | 1  | 3.7452      | 0.2638  | 0.6161   |
| <b>X<sub>2</sub>X<sub>4</sub></b> | 0.1716         | 1  | 0.1716      | 0.0121  | 0.9141   |
| <b>X<sub>3</sub>X<sub>4</sub></b> | 20.928         | 1  | 20.928      | 1.4741  | 0.2463   |
| <b>X<sub>1</sub><sup>2</sup></b>  | 107.92         | 1  | 107.92      | 7.6019  | 0.0163   |
| <b>X<sub>2</sub><sup>2</sup></b>  | 230.76         | 1  | 230.76      | 16.254  | 0.0014   |
| <b>X<sub>3</sub><sup>2</sup></b>  | 146.56         | 1  | 146.56      | 10.324  | 0.0068   |
| <b>X<sub>4</sub><sup>2</sup></b>  | 25.274         | 1  | 25.274      | 1.7802  | 0.2050   |
| <b>Residual</b>                   | 184.56         | 13 | 14.197      |         |          |
| <b>Lack of Fit</b>                | 178.32         | 10 | 17.832      | 8.5685  | 0.0517   |
| <b>Pure Error</b>                 | 6.2432         | 3  | 2.0811      |         |          |
| <b>Cor Total</b>                  | 1034.4         | 27 |             |         |          |

61 Std. Dev.: 3.77, R-square: 0.8216 and CV: 24.45%

62

63 **Table S6** Results of RSM optimization

| Factors        | unit    | Symbol |                 | Coded | Real  |
|----------------|---------|--------|-----------------|-------|-------|
| Enzyme loading | (%)     | X1     | NH <sub>3</sub> | 0.64  | 14.56 |
|                | (mg/mL) |        | EtOH            | -0.73 | 22.7  |
| Temperature    | (°C)    | X2     | NH <sub>3</sub> | 0.5   | 32.5  |
|                |         |        | EtOH            | 0.6   | 33    |
| pH             |         | X3     | NH <sub>3</sub> | 0.68  | 7.68  |
|                |         |        | EtOH            | -0.2  | 6.8   |
| Chloride       | (mM)    | X4     | NH <sub>3</sub> | -0.44 | 56.8  |
|                |         |        | EtOH            | 0.014 | 70.42 |

64

65



66 **Supporting Information #3**

**Sodium  
polycarbonate  
(SAP)**

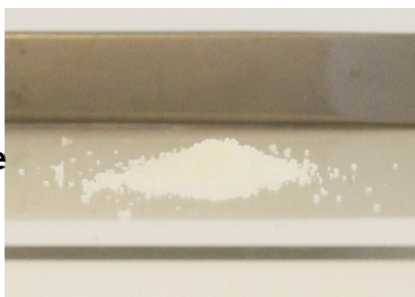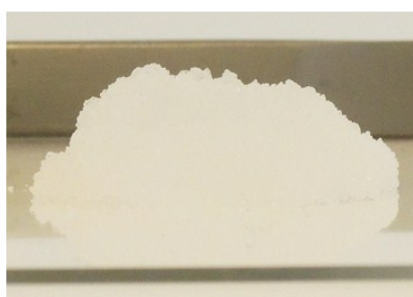

**Cellulose  
absorbent pad**

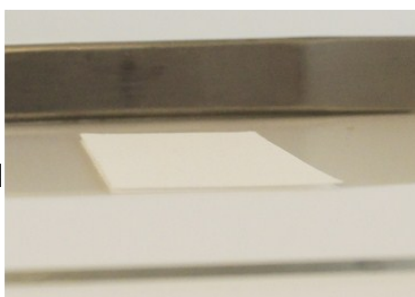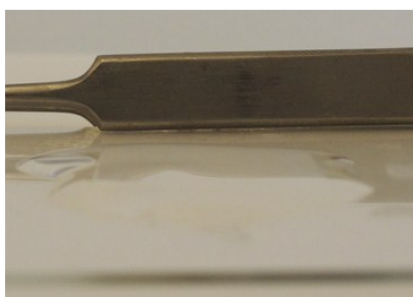

**Cotton  
absorbent pad**

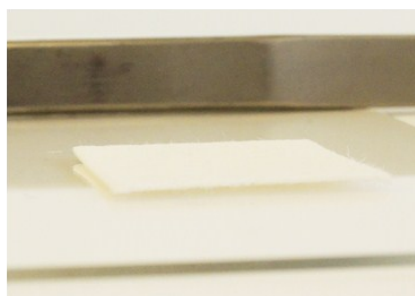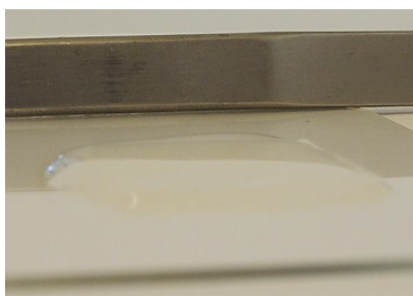

67

68 **Fig. S1 Super Absorbent Polymer swelling and comparison tests with other absorbent pad**  
69 **of cellulose and cotton.** The tests involve same mass of absorbing agent (0.15 g; sodium  
70 polycarbonate, cellulose paper, cotton sheet) and dropping 2 mL of distilled water on it.

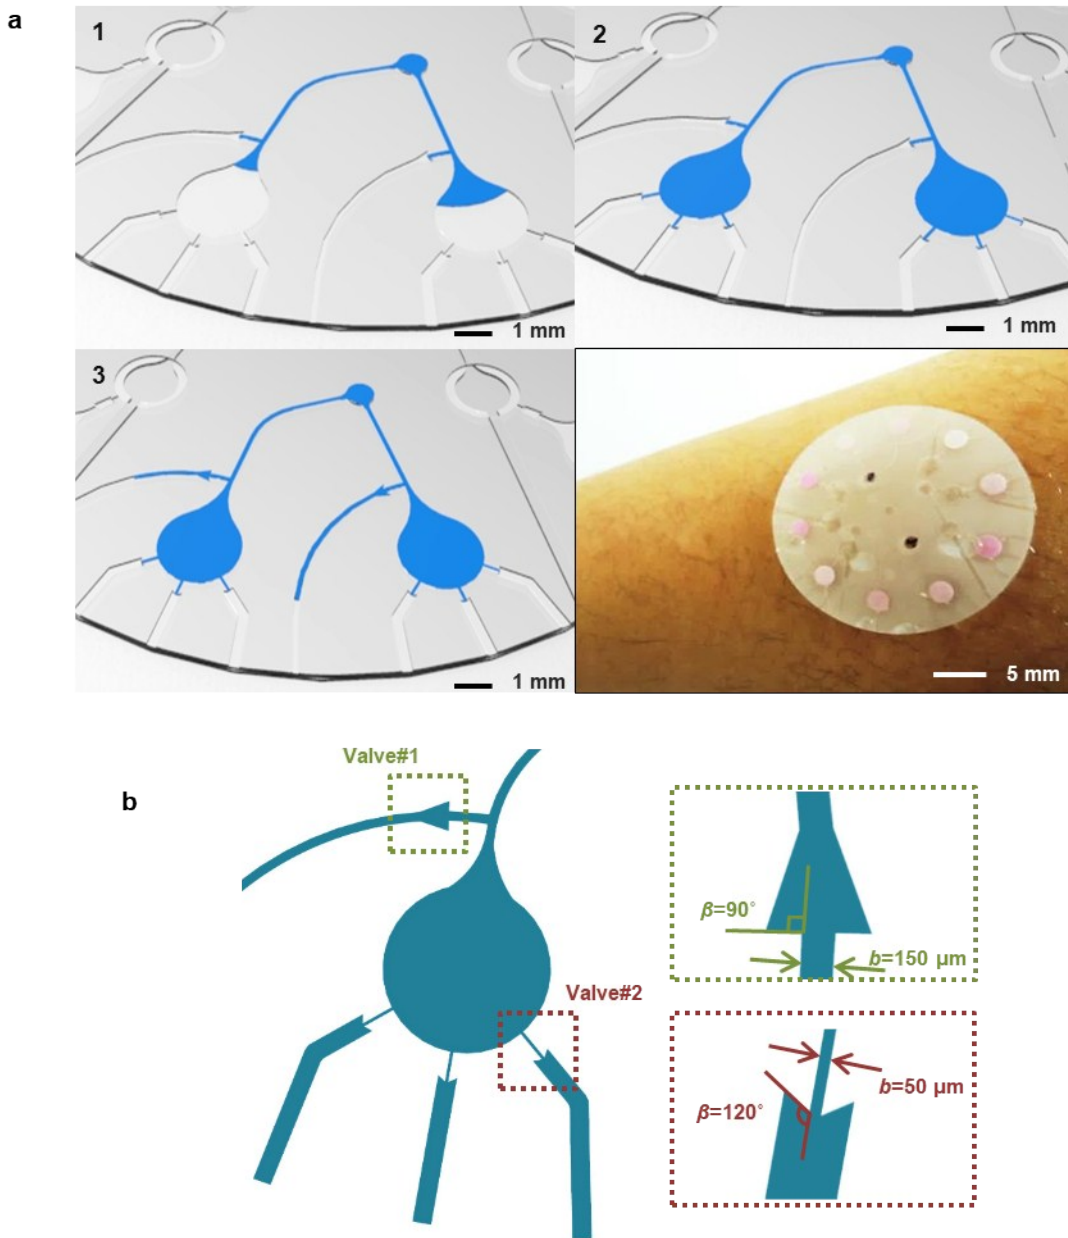

**Fig. S2 Schematic drawing of a microfluidic device showing the sweat filling process via capillary burst valves.** (a) Cartoons show individual wells filling sequentially. The optical image highlights the appearance of the wells after filling and after reactions are completed. (b) Detailed designs and dimensions of the network of valves.

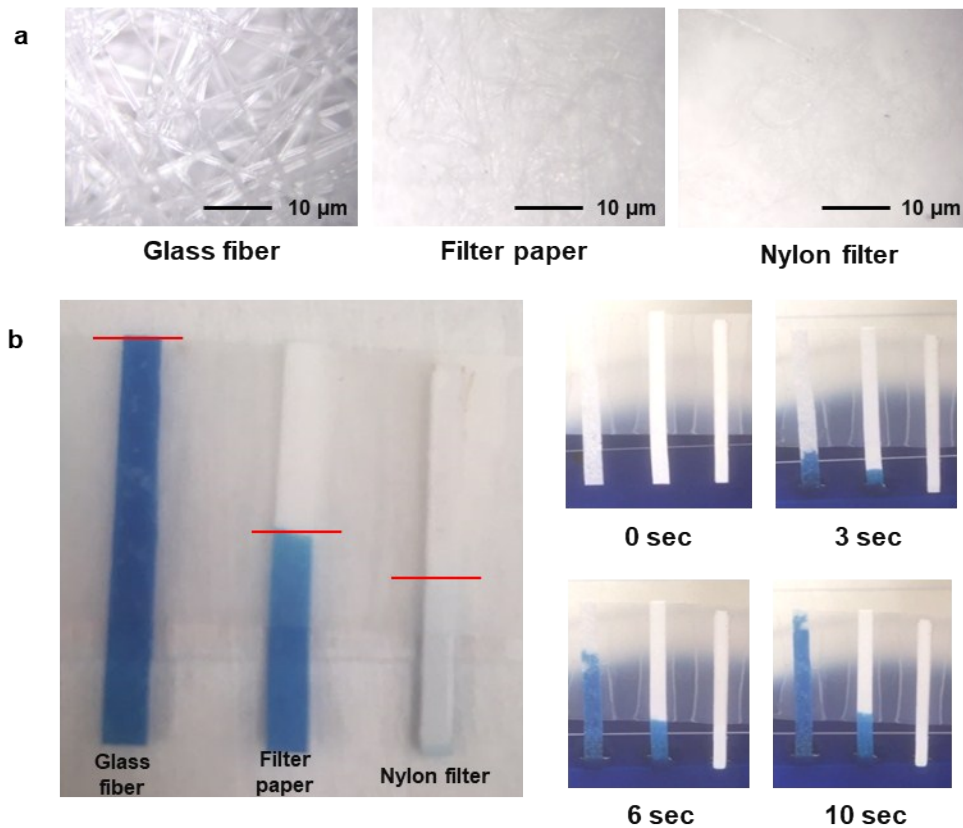

77

78 **Fig. S3 Enzyme matrix tests.** (a) Optical microscope images of glass fiber, filter paper, and  
 79 nylon filter. (b) Water wetting tests at different time intervals for glass fiber, filter paper, and  
 80 nylon filter.

81

a.

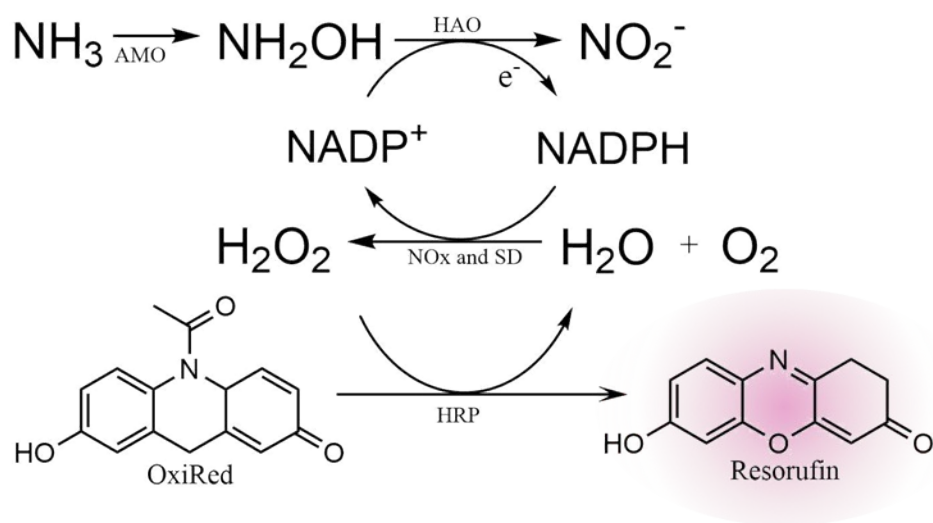

b.

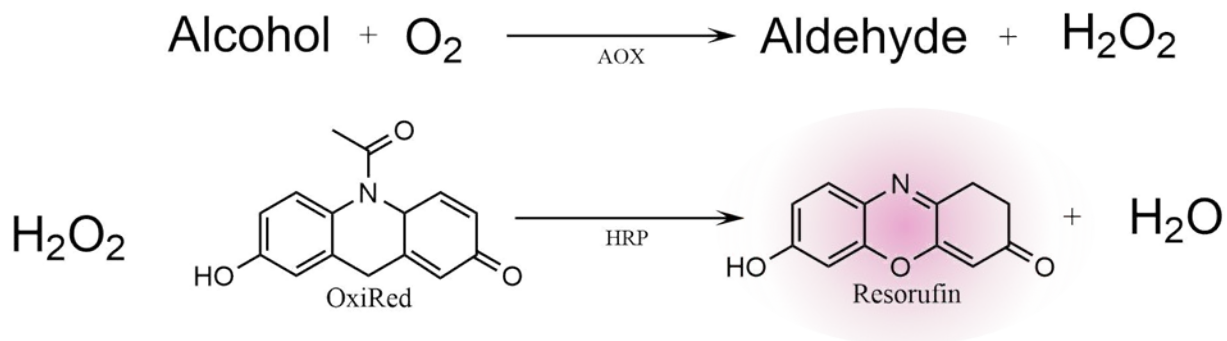

82

83 **Fig. S4 Reaction formulations for the colorimetric assays.** (a) Ammonia oxidation reaction  
 84 and resorufin production. (b) Alcohol oxidation reaction and resorufin production.

85

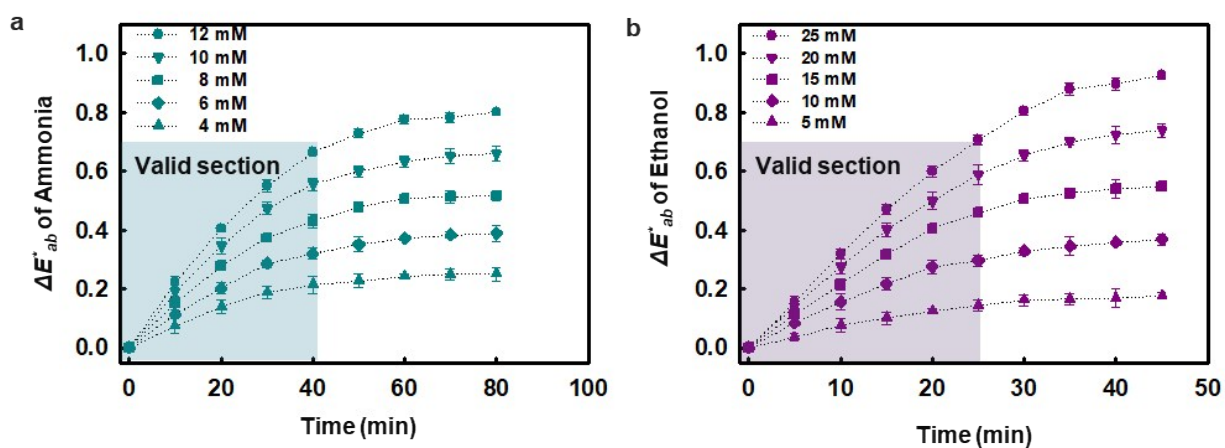

86

87 Fig. S5 Color development as a function of time for (a) ammonia and (b) alcohol assays.

88

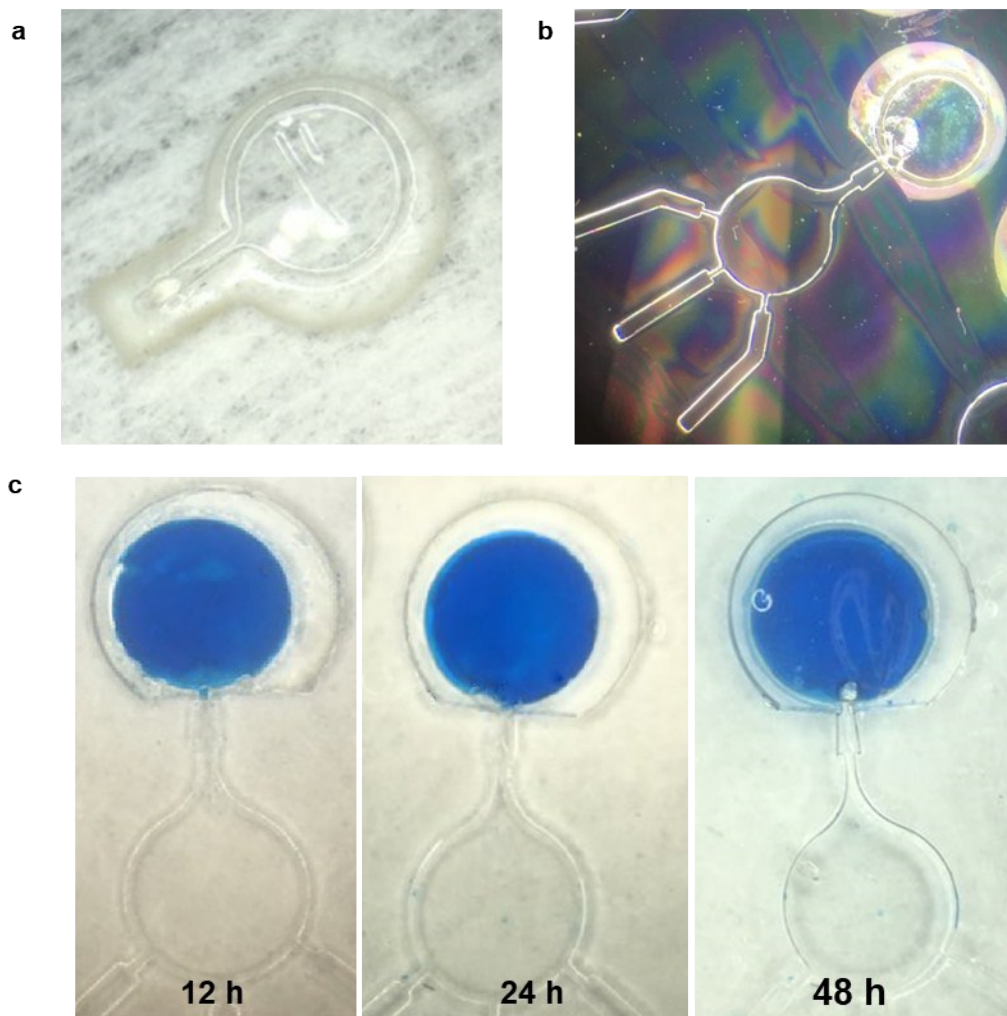

89

90 **Fig. S6 Prevention of evaporation of pre-loaded reagents using plastic reservoirs.** (a) Optical  
 91 image of the plastic reservoir for liquid reagent pre-loading. (b) Soft lithography of plastic  
 92 reservoirs. (c) Evaporation tests using pre-loaded reagents in a plastic reservoir monitored over 48  
 93 h time period with no significant evaporation effects.

94

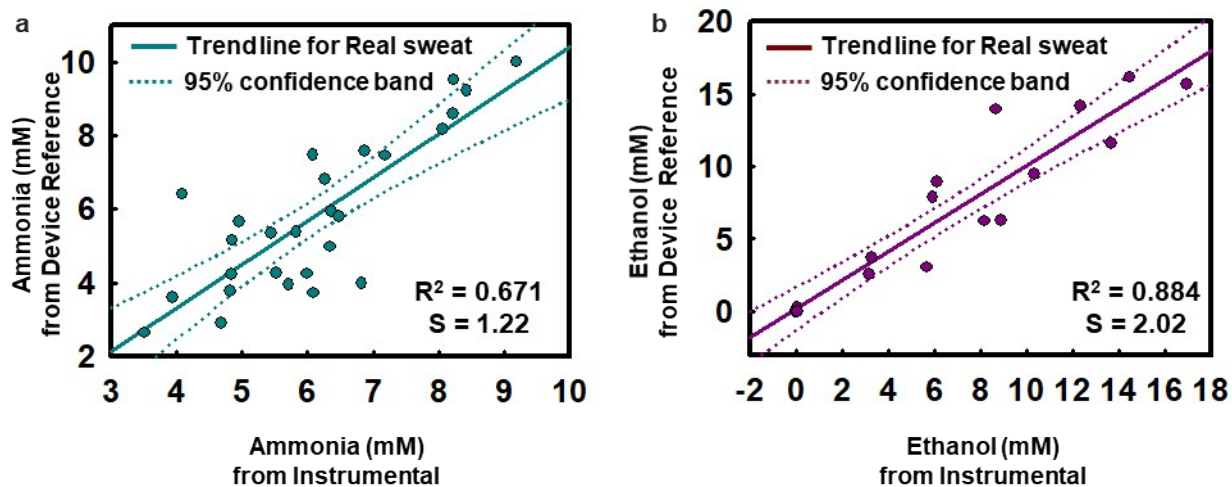

95

96 **Fig. S7 Comparisons of the results of colorimetric and instrumental assays.** (a) Plot of  
 97 ammonia concentration for a series of human sweat samples that are determined after color  
 98 analysis and corresponding instrumental assay (Liquid chromatography-mass spectrometry system;  
 99 Waters Synapt G2-Si ESI, MA, USA). (b) Plot of ethanol concentration evaluated in a similar  
 100 manner.

101



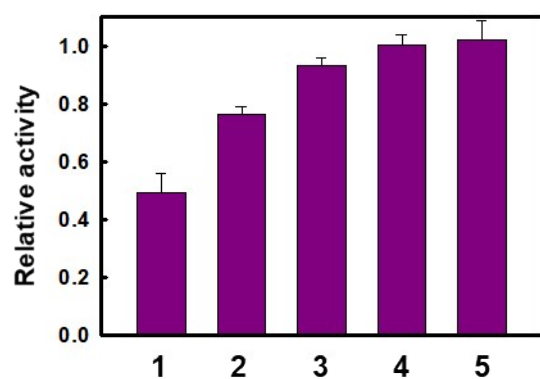

1. 90% AOx : 10%HRP
2. 80% AOx : 20% HRP
3. 70% AOx : 30% HRP
4. 60% AOx : 40% HRP
5. 50% AOx : 50% HRP

102

103 **Fig. S8 Effect of AOx-HRP ratio of enzyme cocktail for alcohol assay.**

104



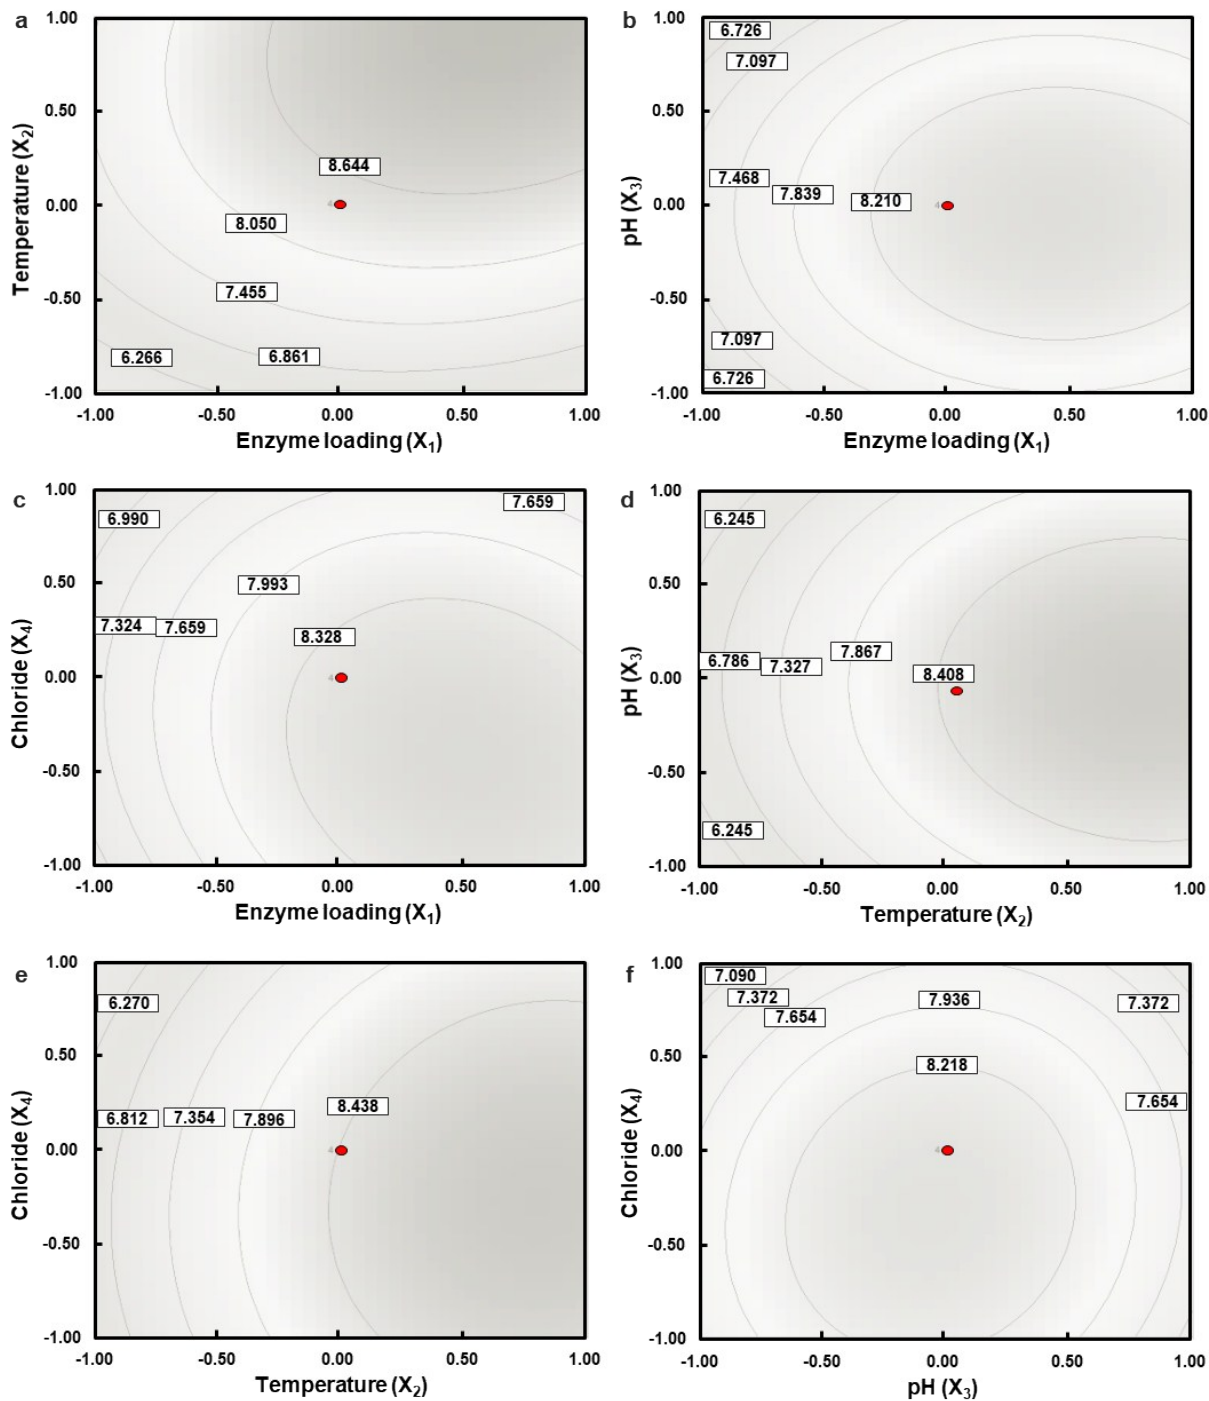

**Fig. S9 Contour plots of the response of the ammonia oxidation reaction to external factors.** (a) Enzyme loading vs temperature. (b) Enzyme loading vs pH. (c) Enzyme loading vs chloride. (d) Temperature vs pH. (e) Temperature vs chloride. (f) pH vs chloride.

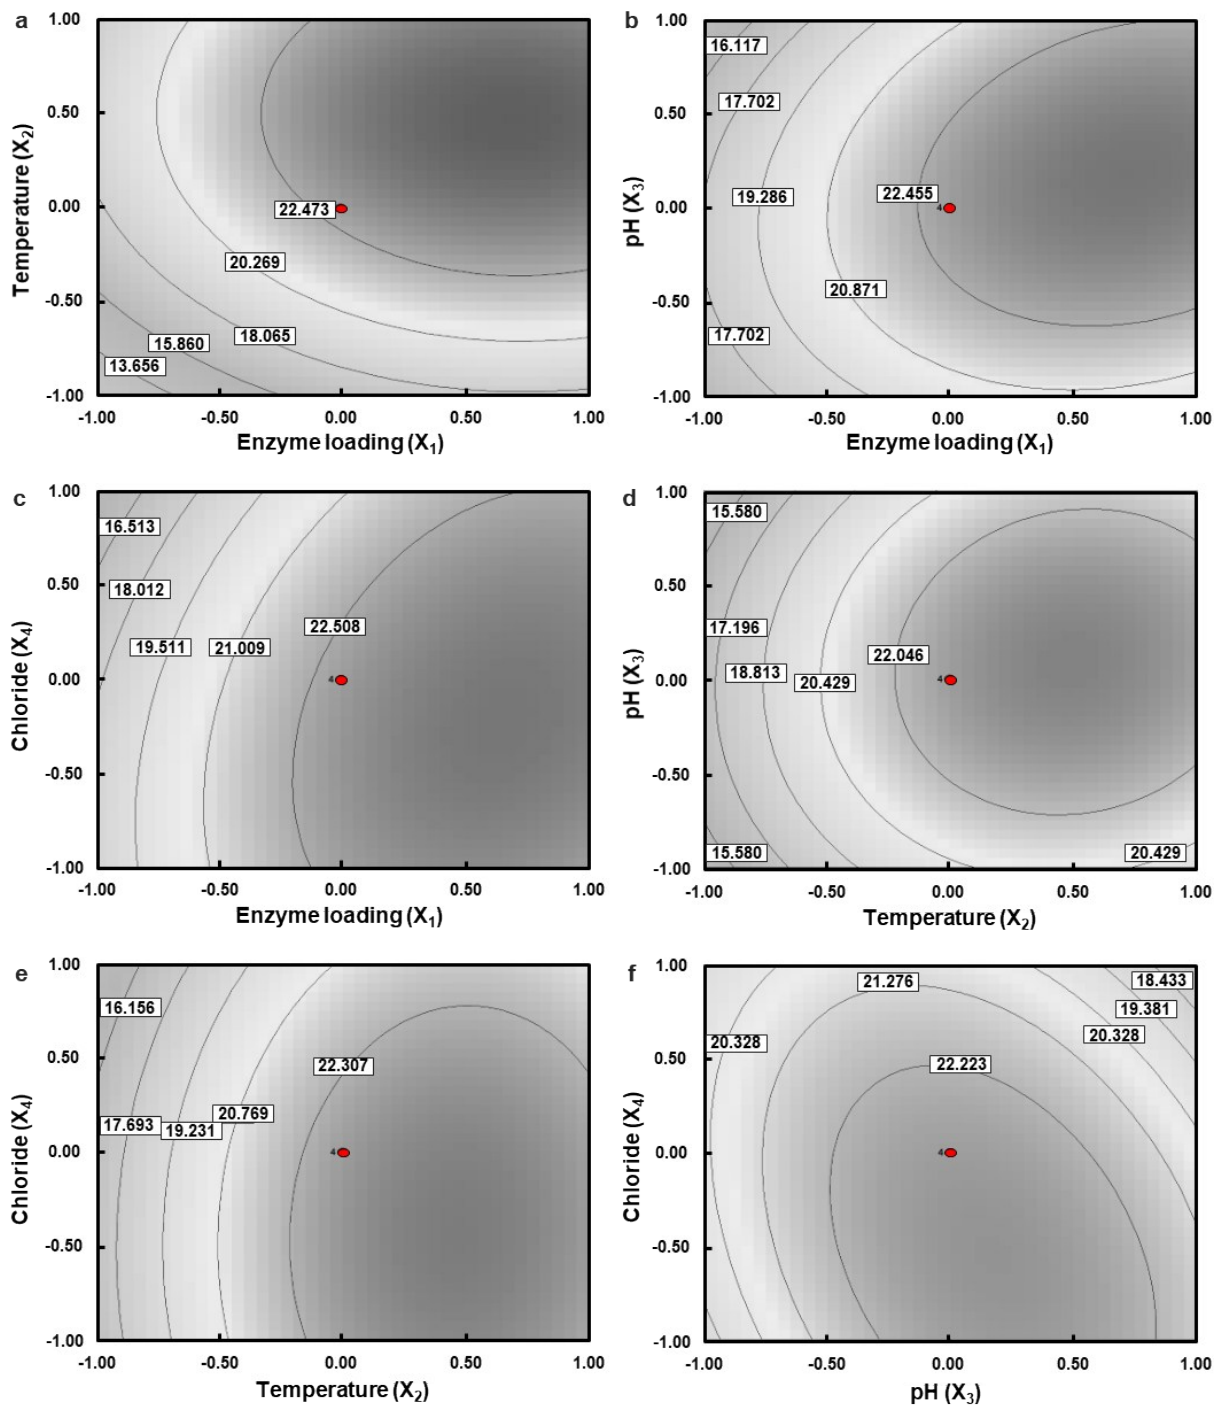

111

112 **Fig. S10 Contour plots of the response of the alcohol oxidation reaction to external factors.**  
 113 (a) Enzyme loading vs temperature. (b) Enzyme loading vs pH. (c) Enzyme loading vs chloride.  
 114 (d) Temperature vs pH. (e) Temperature vs chloride. (f) pH vs chloride.

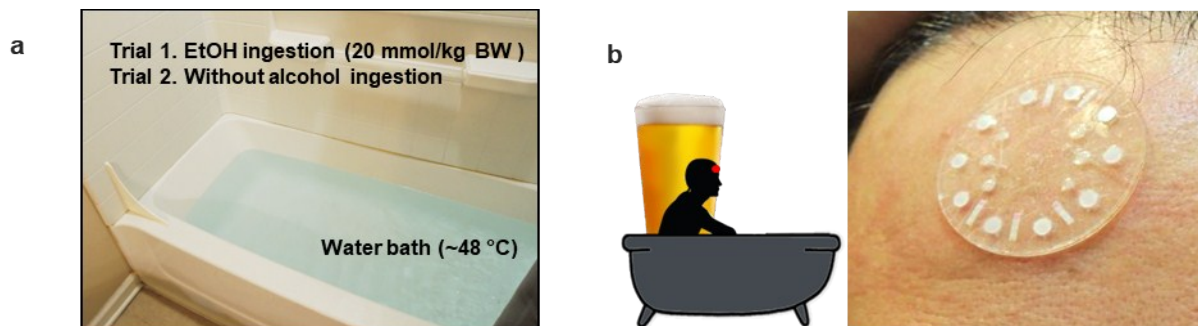

116

117

118 **Fig. S11 Field tests conditions with multiple healthy subjects.** (a) Optical image of warm water  
119 bath prepared for human subjects. (b) Microfluidic device attached to the forehead region on  
120 subject.

121

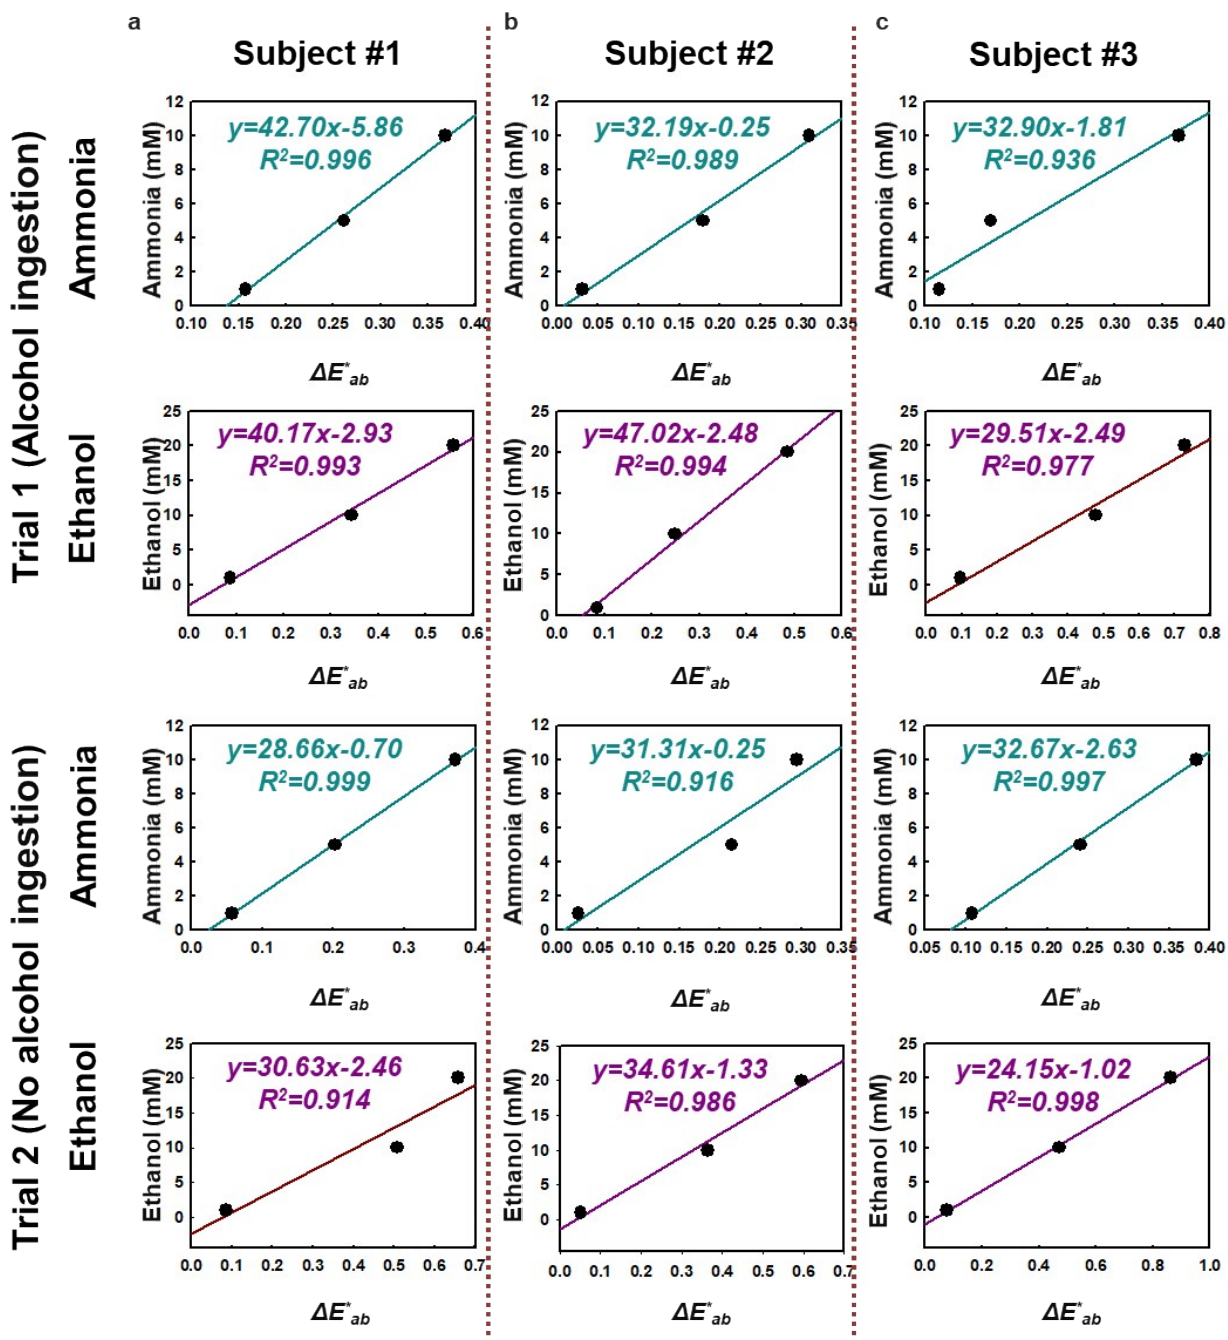

123

124 **Fig. S12 Calibration curves from reference reaction reservoirs on the devices in field tests**  
 125 **for subject #1 (a), subject #2 (b), and subject #3 (c).**

126

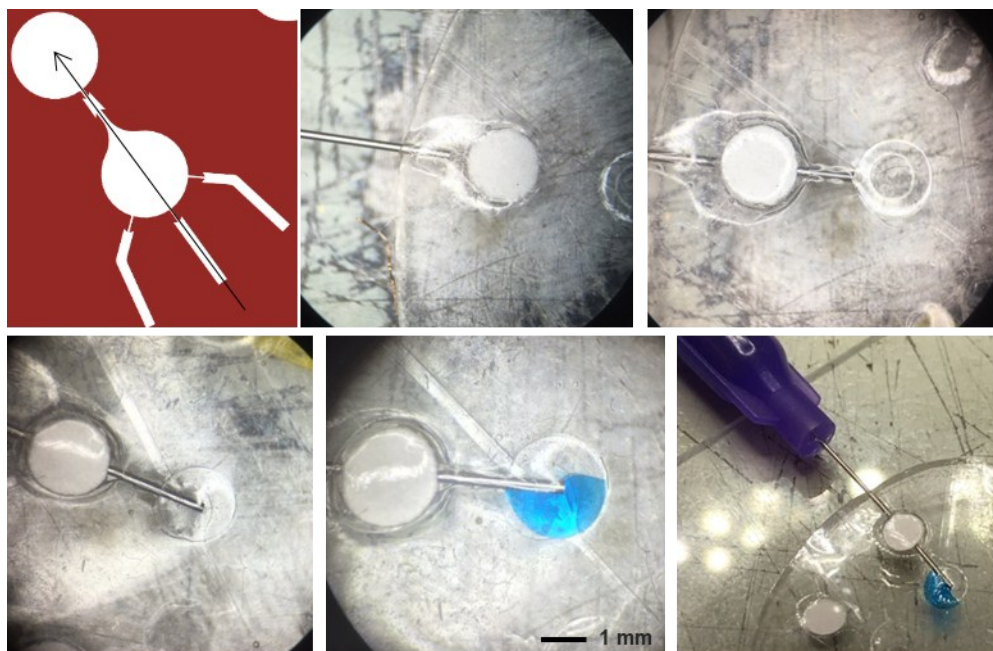

127

128 **Fig. S13 Reagent pre-loading method using 30 GA (300  $\mu\text{m}$   $\Phi$ ) needle.**

129
